# Supplementary material for: Predicting Postoperative Delirium in Cardiac Surgery Patients: Integrating Psychological and Infectious Risk Factors
Source: Research Square preprint supplement (doi:10.21203/rs.3.rs-6790980/v1), 2025-09-02
Supplement: Supplementary file 1 [file 412cb83c6e44d3b0a78cf584.docx]

**SUPPLEMENTAL MATERIAL**

**Predicting Postoperative Delirium in Cardiac Surgery Patients: Integrating Psychological and Infectious Risk Factors**

**Supplemental Tables**

Table I. Distribution of surgical types in the overall population, training and validation cohorts

Table II. Baseline characteristic of patients suffering or not suffering from delirium in the overall cohort

Table III. Baseline characteristic of patients suffering or not suffering from delirium in the validation cohort

| **Surgical Type, No (%)** | **Total**  **(n=1119)** | **Training**  **(n=783)** | **Validation (n=336)** |
| --- | --- | --- | --- |
| Aortic surgery | 80 (7.1) | 58 (7.4) | 22 (6.5) |
| Isolated CABG | 381(34.0) | 272 (34.7) | 109 (32.4) |
| CABG + valvular surgery | 85 (7.6) | 57 (7.3) | 28 (8.3) |
| Congenital heart surgery | 88 (7.9) | 62 (7.9) | 26 (7.7) |
| Isolated valvular surgery | 485 (43.3) | 334 (42.7) | 151 (44.9) |

**Table I. Distribution of surgical types in the overall population, training and validation cohorts.**

Complex surgery was defined as either aortic surgery or CABG with valvular surgery

CABG=coronary artery bypass grafting.

**Table II Baseline characteristic of patients suffering or not suffering from delirium in the overall cohort**

|  | **Overall Cohort** | | |  |
| --- | --- | --- | --- | --- |
|  | **Total (N=1119)** | **No delirium**  **(N=1029)** | **Delirium (N=90)** | **p value** |
| Age (y) | 54.35 (12.96) | 54.02 (13.00) | 58.06 (11.99) | 0.005 |
| Female | 346 (30.9) | 312 (30.3) | 34 (37.8) | 0.005 |
| BMI | 24.49 (3.26) | 24.54(3.23) | 24.00(3.57) | 0.137 |
| Smoking history | 454 (40.6) | 421(40.9) | 33(36.7) | 0.500 |
| Diabetes mellitus | 228 (20.4) | 207 (20.1) | 21 (23.3) | 0.555 |
| Previous stroke | 47 (4.2) | 38 (3.7) | 9 (10.0) | 0.010 |
| LDL (mmol/L) | 2.37 (0.87) | 2.37 (0.86) | 2.43 (0.95) | 0.542 |
| EF < 50% | 60 (5.4) | 51 (5.0) | 9 (10.0) | 0.073 |
| LV >55mm | 357 (31.9) | 319 (31.0) | 38 (42.2) | 0.038 |
| Emergency operation | 13 (1.2) | 10 (1.0) | 3 (3.33) | 0.136 |
| SAS scalea |  |  |  | 0.004 |
| 1 | 1008 (91.1) | 936 (91.0) | 72 (80.0) |  |
| 2 | 100 (8.9) | 84 (8.2) | 16 (17.8) |  |
| 3 | 11 (1.0) | 9 (0.9) | 2 (2.2) |  |
| SDS scaleb |  |  |  | 0.007 |
| 1 | 873 (78.0) | 812 (78.9) | 61 (67.8) |  |
| 2 | 173 (15.5) | 157 (15.3) | 16 (17.8) |  |
| 3 | 70 (6.3) | 58 (5.6) | 12 (13.3) |  |
| 4 | 3 (0.3) | 2 (0.2) | 1 (1.1) |  |
| PSQIc |  |  |  | 0.006 |
| 1 | 577 (51.6) | 538 (52.3) | 39 (43.3) |  |
| 2 | 373 (33.3) | 340 (33.0) | 33 (36.7) |  |
| 3 | 141 (12.6) | 130 (12.6) | 11 (12.2) |  |
| 4 | 28 (2.5) | 21 (2.0) | 7 (7.8) |  |
| Use of CPB | 897 (80.2) | 826 (80.3) | 71 (78.9) | 0.859 |
| Redo operation | 48 (4.3) | 42 (4.1) | 6 (6.7) | 0.374 |
| Complex cardiac surgeryd | 165 (14.7) | 144 (14.0) | 21 (23.3) | 0.025 |
| Re-exploration | 18 (1.6) | 13 (1.3) | 5 (5.6) | 0.008 |
| Postoperative infectione | 59 (5.3) | 46 (4.5) | 13 (14.4) | <0.001 |
| Acute kidney injuryf | 127 (11.3) | 114 (11.1) | 13 (14.4) | 0.428 |
| Ventilation time (h) | 21.38 (32.30) | 16.67 (12.38) | 75.28 (90.23) | <0.01 |

BMI = body mass index, LDL = low-density lipoprotein cholesterol, EF = ejection fraction, LV = left ventricular end-diastolic dimension, SAS = Self-Rating Anxiety Scale, SDS = Self-Rating Depression Scale, PSQI = Pittsburgh Sleep Quality Index, CPB = cardiopulmonary bypass

a. SAS scale: 1 denotes normal range. 2 denotes mild to moderate anxiety level. 3 denotes marked to severe anxiety level2.

b. SDS scale: 1 denotes normal range. 2 denotes mild depression level. 3 denotes moderate depression level. 4 denotes severe depression level.

c. PSQI: 1 denotes sleep quality is good. 2 denotes sleep quality is better. 3 denotes sleep quality is average. 4 denotes sleep quality is poor.

d. Complex surgery denotes the aorta surgery or CABG combined with valve surgery.

e. Postoperative infection denotes positive bacterial culture results, antibiotic upgrades to third-generation cephalosporins or above, etc

f. Renal insufficiency was defined as the level of creatinine exceed the respective thresholds of 81 μmol/L for females and 111 μmol/L for male

**Table III Baseline characteristic of patients suffering or not suffering from delirium in the validation cohort**

|  | **Validation Cohort** | |  |
| --- | --- | --- | --- |
|  | No delirium (N=309) | Delirium (N=27) | p value |
| Age (y) | 53.17 (12.90) | 60.15 (13.50) | 0.00 |
| Female | 105 (34.0) | 9 (33.3) | 1.00 |
| BMI | 24.60 (3.48) | 23.55 (3.18) | 0.13 |
| Smoking history | 120 (38.8) | 5 (18.5) | 0.06 |
| Diabetes mellitus | 58 (18.8) | 6 (22.2) | 0.86 |
| Previous stroke | 14 (4.5) | 3 (11.1) | 0.30 |
| Hypertension classificationa |  |  | 0.97 |
| 0 | 174 (64.2) | 14 (63.6) |  |
| 1 | 17 (6.3) | 1 (4.5) |  |
| 2 | 30 (11.1) | 3 (13.6) |  |
| 3 | 50 (18.5) | 4 (18.2) |  |
| LDL (mmol/L) | 2.42 (0.86) | 2.68 (1.04) | 0.15 |
| EF < 50% | 11 (3.6) | 3 (11.1) | 0.17 |
| LV >55mm | 88 (28.5) | 12 (44.4) | 0.13 |
| Emergency operation | 3 (1.0) | 1 (3.7) | 0.74 |
| SAS scaleb |  |  | 0.17 |
| 1 | 288 (93.2) | 23 (85.2) |  |
| 2 | 18 (5.8) | 4 (14.8) |  |
| 3 | 3 (1.8) | 0 (0.0) |  |
| SDS scalec |  |  | NaN |
| 1 | 249 (80.6) | 19 (70.4) |  |
| 2 | 45 (14.6) | 6 (22.2) |  |
| 3 | 15 (4.9) | 2 (7.4) |  |
| 4 | 0 (0.0) | 0 (0.0) |  |
| PSQId |  |  | 0.93 |
| 1 | 176 (57.0) | 14 (51.9) |  |
| 2 | 92 (29.8) | 9 (33.3) |  |
| 3 | 34 (11.0) | 3 (11.1) |  |
| 4 | 7 (2.3) | 1 (3.7) |  |
| Use of CPB | 250 (80.9) | 24 (88.9) | 0.44 |
| Redo operation | 13 (4.2) | 3 (11.1) | 0.25 |
| Complex cardiac surgerye | 45 (14.60) | 5 (18.5) | 0.79 |
| Re-exploration | 3 (1.0) | 1 (3.7) | 0.74 |
| Postoperative infectionf | 14 (4.5) | 4 (14.8) | 0.07 |
| Acute kidney injuryg | 32 (10.4) | 4 (14.8) | 0.69 |
| Ventilation time (h) | 15.49 (8.73) | 71.15 (84.42) | <0.001 |

BMI = body mass index, LDL = low-density lipoprotein cholesterol, EF = ejection fraction, LV = left ventricular end-diastolic dimension, SAS = Self-Rating Anxiety Scale, SDS = Self-Rating Depression Scale, PSQI = Pittsburgh Sleep Quality Index, CPB = cardiopulmonary bypass

a. Hypertension classification: 0 denotes SBP is of 120-139 mm Hg and/or DBP is of 80-89 mm Hg. 1 denotes SBP is of 140-159 mm Hg and/or DBP is of 90-99 mm Hg. 2 denotes SBP is of 160-179 mm Hg or greater and/or DBP is of 100-109 mm Hg. 3 denotes SBP is of 180 mm Hg or greater and/or DBP is of 110 mm Hg or greater1.

b. SAS scale: 1 denotes normal range. 2 denotes mild to moderate anxiety level. 3 denotes marked to severe anxiety level2.

c. SDS scale: 1 denotes normal range. 2 denotes mild depression level. 3 denotes moderate depression level. 4 denotes severe depression level.

d. PSQI: 1 denotes sleep quality is good. 2 denotes sleep quality is better. 3 denotes sleep quality is average. 4 denotes sleep quality is poor.

e. Complex surgery denotes the aorta surgery or CABG combined with valve surgery.

f. Postoperative infection denotes positive bacterial culture results, antibiotic upgrades to third-generation cephalosporins or above, etc

g. Renal insufficiency was defined as the level of creatinine exceed the respective thresholds of 81 μmol/L for females and 111 μmol/L for male

**References**

1. Williams B, Mancia G, Spiering W, et al. [2018 ESC/ESH Guidelines for the management of arterial hypertension. The Task Force for the management of arterial hypertension of the European Society of Cardiology (ESC) and the European Society of Hypertension (ESH)]. *G Ital Cardiol (Rome)* 2018;19(11 Suppl 1):3s-73s. doi: 10.1714/3026.30245

2. Zung WW. A rating instrument for anxiety disorders. *Psychosomatics* 1971;12(6):371-9. doi: 10.1016/s0033-3182(71)71479-0
